# Supplementary material for: Deprotection Reagents in Fmoc Solid Phase Peptide Synthesis: Moving Away from Piperidine?
Source: PubMed Central journal article supplement (PMC6274427; doi:10.3390/molecules21111542), 2016-11-15
Supplement: molecules-21-01542-s001.pdf [file molecules-21-01542-s001.pdf]

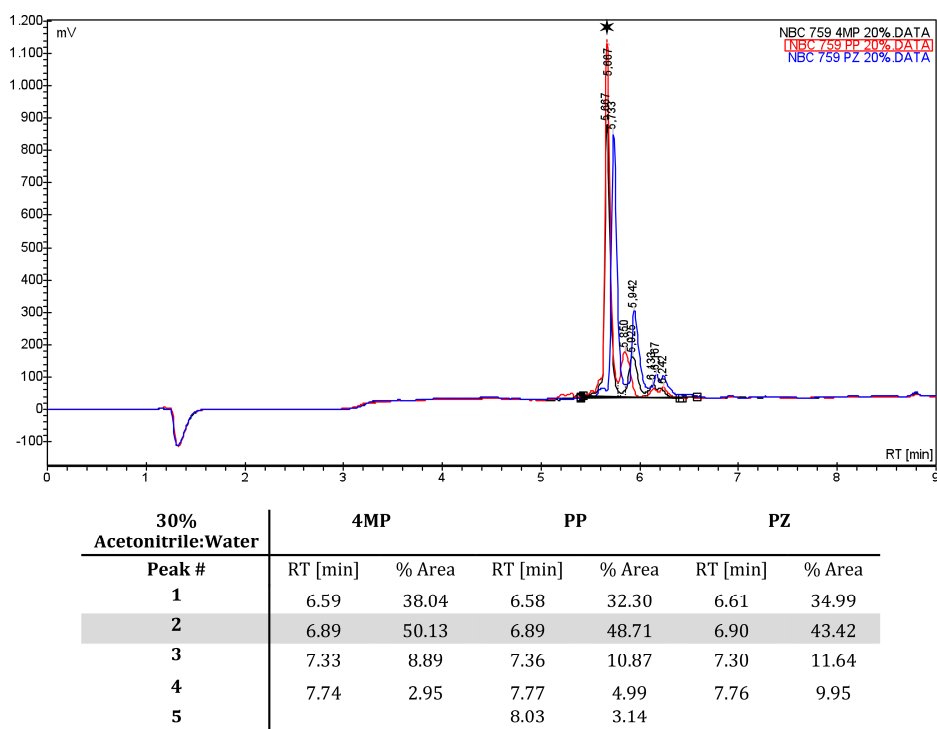

**Figure S3.** HPLC for peptide NBC759 20% acetonitrile:water fraction, main specie are indicated with a star. The data are superimposed for the three deprotection reagents; Black: 4-Methyl piperidine (4MP). Red: Piperidine (PP) and Blue: Piperazine (PZ).

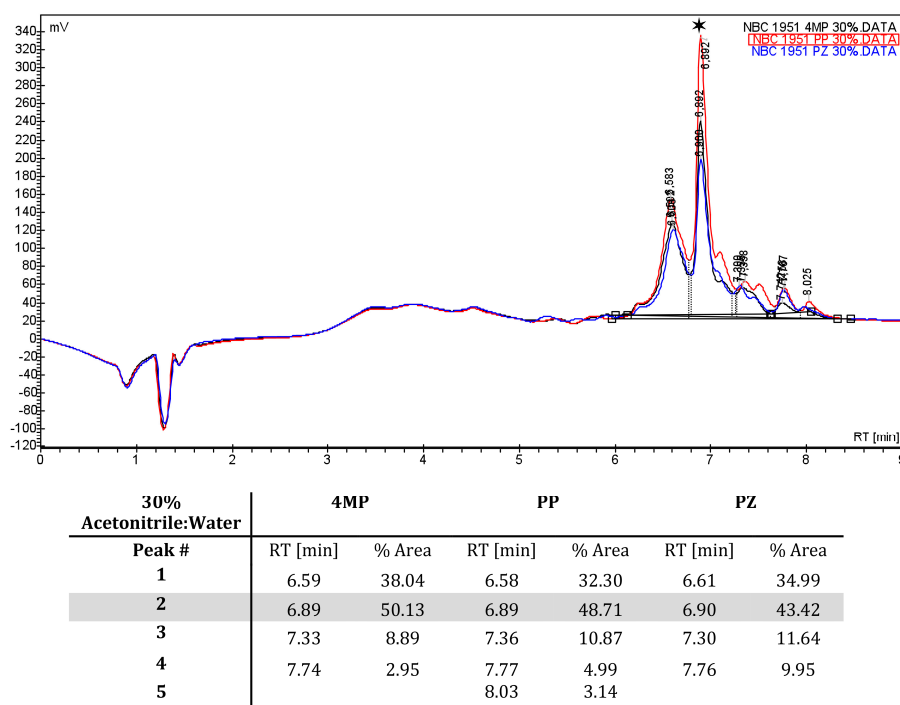

**Figure S4.** HPLC for peptide NBC1951 30% acetonitrile:water fraction, main specie are indicated with a star. The data are superimposed for the three deprotection reagents; Black: 4-Methyl piperidine (4MP). Red: Piperidine (PP) and Blue: Piperazine (PZ).

**Table S1.** Retention times and % area for the crude product with the three deprotection reagents, for NBC112 chromatogram in the figure 1A. The main peak (8) corresponding to the peptide NBC112 is highlighted in grey.

| Crude<br>Peak # | 4MP      |       | PP       |       | PZ       |       |
|-----------------|----------|-------|----------|-------|----------|-------|
|                 | RT (min) | %Area | RT (min) | %Area | RT (min) | %Area |
| 1               | 4.48     | 15.71 | 4.45     | 9.62  |          |       |
| 2               |          |       |          |       | 5.08     | 6.13  |
| 3               |          |       |          |       | 5.28     | 4.99  |
| 4               | 5.48     | 8.60  | 5.38     | 11.58 | 5.38     | 16.71 |
| 5               |          |       |          |       | 5.66     | 1.91  |
| 6               |          |       |          |       | 5.8      | 1.01  |
| 7               | 5.93     | 14.94 | 5.81     | 22.41 | 5.92     | 5.99  |
| 8               | 6.18     | 47.65 | 6.13     | 43.57 | 6.18     | 57.73 |
| 9               | 6.50     | 13.09 | 6.44     | 12.82 | 6.44     | 2.72  |
| 10              |          |       |          |       | 6.56     | 2.8   |

**Table S2.** Retention times and % Area for the crude product with the three deprotection reagents, for NBC155 chromatogram in figure 1B. The main peak (3) corresponding to the peptide NBC155 is highlighted in grey.

| Crude<br>Peak # | 4MP      |       | PP       |       | PZ       |       |
|-----------------|----------|-------|----------|-------|----------|-------|
|                 | RT (min) | %Area | RT (min) | %Area | RT (min) | %Area |
| 1               | 5.03     | 6.58  | 5.00     | 10.11 | 4.99     | 6.72  |
| 2               | 5.34     | 28.31 | 5.33     | 23.85 | 5.31     | 26.66 |
| 3               | 5.55     | 65.11 | 5.57     | 66.04 | 5.53     | 66.62 |

**Table S3.** Retention times and % Area for the crude product with the three deprotection reagents, for NBC759 chromatogram in figure 1C. The main peak (2) corresponding to the peptide NBC759 is highlighted in grey.

| Crude<br>Peak # | 4MP      |       | PP       |       | PZ       |       |
|-----------------|----------|-------|----------|-------|----------|-------|
|                 | RT (min) | %Area | RT (min) | %Area | RT (min) | %Area |
| 1               | 5.19     | 5.48  |          |       |          |       |
| 2               | 5.66     | 50.49 | 5.63     | 59.09 | 5.69     | 55.56 |
| 3               | 5.90     | 13.90 | 5.95     | 13.15 | 5.93     | 13.76 |
| 4               | 6.26     | 14.05 | 6.26     | 14.52 | 6.26     | 15.63 |
| 5               | 6.53     | 9.75  | 6.54     | 13.24 | 6.53     | 15.05 |
| 6               | 6.76     | 6.33  |          |       |          |       |

**Table S4.** Retention times and % Area for the crude product with the three deprotection reagents, for NBC1951 chromatogram in figure 1D. The main peak (7) corresponding to the peptide NBC1951 is highlighted in grey.

| Crude<br>Peak # | 4MP      |       | PP       |       | PZ       |       |
|-----------------|----------|-------|----------|-------|----------|-------|
|                 | RT (min) | %Area | RT (min) | %Area | RT (min) | %Area |
| 1               | 4.85     | 5.48  | 4.88     | 6.59  | 4.78     | 6.74  |
| 2               | 5.26     | 3.65  |          |       |          |       |
| 3               | 5.52     | 10.15 | 5.62     | 13.55 | 5.48     | 13.48 |
| 4               | 5.92     | 11.25 | 5.93     | 12.45 | 5.88     | 11.26 |
| 5               | 6.11     | 16.52 | 6.18     | 14.82 | 6.13     | 18.86 |
| 6               | 6.62     | 24.33 | 6.67     | 19.51 | 6.62     | 17.58 |
| 7               | 6.93     | 20.55 | 6.93     | 29.04 | 6.94     | 21.43 |
| 8               | 7.45     | 4.44  |          |       | 7.41     | 6.18  |
| 9               | 7.88     | 2.33  | 7.79     | 2.53  | 7.79     | 4.46  |
| 10              | 8.07     | 1.30  | 7.99     | 1.52  | 6.56     | 2.8   |

**Table S5.** Summary of physicochemical properties calculated. Figures for Pepfold3 predicted structure were made with Chimera [1].

| Peptide | #Res | Aliphatic *<br>Index | GRAVY * | IP *  | Net<br>Charge<br>pH = 7 ** | Average<br>Hydrophilicity ** | Pepfold3 Structure                                                                   |
|---------|------|----------------------|---------|-------|----------------------------|------------------------------|--------------------------------------------------------------------------------------|
| NBC112  | 13   | 150                  | 0.777   | 6.92  | 1.2                        | -0.5                         | 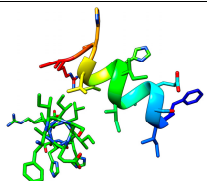  |
| NBC155  | 9    | 97.78                | -0.022  | 4.53  | 0.0                        | 0.3                          |   |
| NBC759  | 13   | 75.38                | -1.192  | 11.39 | 7.0                        | 0.2                          |   |
| NBC1951 | 26   | 113.08               | 0.408   | 10.3  | 6.0                        | -0.3                         |  |

\* Calculated through ExPASy server; \*\* Calculated through Bachem webpage <http://www.bachem.com>.

**Table S6.** Summary of physicochemical properties for the deprotection reagents. Extracted from Merckmillipore webpage (<http://www.merckmillipore.com/>).

| Information                        | 4MP                                 | PP                                    | PZ                                  |
|------------------------------------|-------------------------------------|---------------------------------------|-------------------------------------|
| <b>Physicochemical Information</b> |                                     |                                       |                                     |
| CAS Number                         | 626-58-4                            | 110-89-4                              | 110-85-0                            |
| Boiling point                      | 105–108 °C (1013 hPa)               | 106 °C (1013 hPa)                     | —                                   |
| Density                            | 0.84 g/cm <sup>3</sup> (20 °C)      | 0.86 g/cm <sup>3</sup> (20 °C)        | 1.1 g/cm <sup>3</sup> (20 °C)       |
| Explosion limit                    | —                                   | 1.5%–10.3% (V)                        | 4%–14% (V)                          |
| Flash point                        | 13 °C                               | 16 °C                                 | 65 °C                               |
| Ignition temperature               | —                                   | 320 °C                                | 320 °C DIN 51794                    |
| Melting point                      | 4–5 °C                              | -10.8 °C                              | 107–111 °C                          |
| pH value                           | 13 (100 g/L H <sub>2</sub> O 20 °C) | 12.6 (100 g/L H <sub>2</sub> O 20 °C) | 12 (150 g/L H <sub>2</sub> O 20 °C) |
| Vapor pressure                     | 16 hPa (20 °C)                      | 34 hPa (20 °C)                        | <10 hPa (20 °C)                     |
| <b>Toxicological Information</b>   |                                     |                                       |                                     |
| LD 50 dermal                       | —                                   | LD50 Rabbit 276 mg/kg                 | LD50 Rabbit 8300 mg/kg              |
| LD 50 oral                         | —                                   | —                                     | LD50 Rat 2600 mg/kg                 |

## References

1. Pettersen, E.F.; Goddard, T.D.; Huang, C.C.; Couch, G.S.; Greenblatt, D.M.; Meng, E.C.; Ferrin, T.E. UCSF Chimera—a visualization system for exploratory research and analysis. *J. Comput. Chem.* **2004**, *25*, 1605–1612.
